# Supplementary material for: PhenoModifier: a genetic modifier database for elucidating the genetic basis of human phenotypic variation
Source: PubMed Central journal article supplement — Nucleic Acids Res. 2019 Oct 23;48(D1):D977–82. doi: 10.1093/nar/gkz930 (PMC7145690; doi:10.1093/nar/gkz930), 2019-10-23
Supplement: gkz930_supplemental_file.pdf [file gkz930_supplemental_file.pdf]

## Supplemental Materials for

### PhenoModifier: a genetic modifier database for elucidating the genetic basis of human phenotypic variation

**Supplementary Table S1:** Overview of the keywords used to search the Pubmed database.

| Modify and its synonyms                                                                      | Words that describe modifier effects                                                                                                                                                                                                                                                             |
|----------------------------------------------------------------------------------------------|--------------------------------------------------------------------------------------------------------------------------------------------------------------------------------------------------------------------------------------------------------------------------------------------------|
| modify, modifying, modified modifier, modifiers, modulate, modulating, modulated, modulation | phenotype variability, variable clinical presentation, disparate phenotypes, novel phenotype, phenotypic variation, phenotypic heterogeneity, age of onset, early onset, late onset, penetrance, pleiotropy, expressivity, protect, protecting, protection, protective, severe, severity, modest |

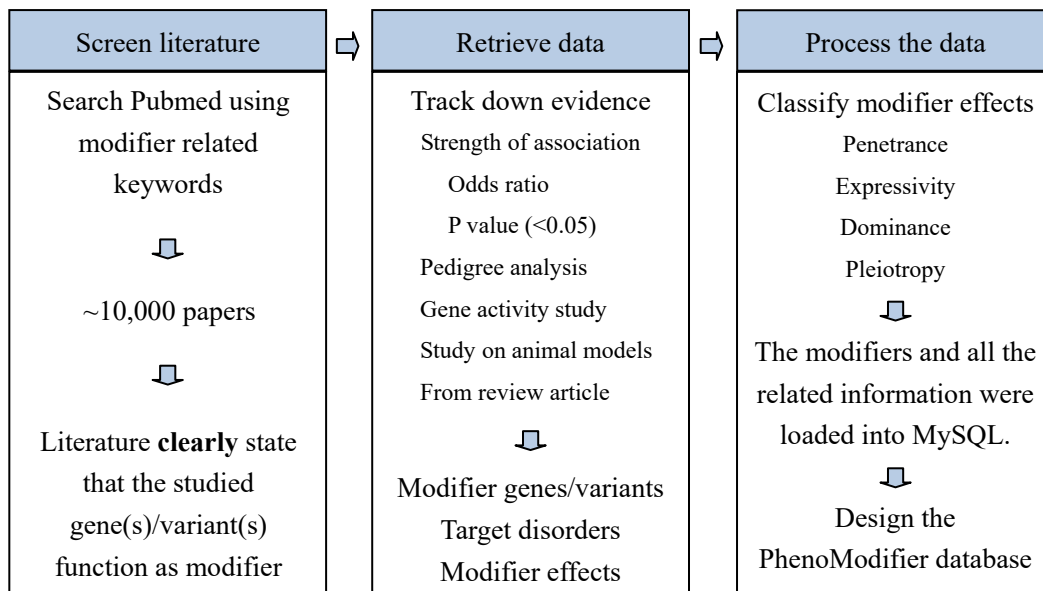

**Supplementary Figure S1:** Schematic representation of the data curation and processing procedure.
